# Supplementary material
Source: publisher site journal article supplement (https://www.dovepress.com/get_supplementary_file.php?f=438893.docx)
Supplement: Supplementary file 1 [file get_supplementary_file.php]

**Supplemental Table 1:** **Codes indicating an AECOPD diagnosis**

| **Code** | **Condition each code indicates** | **Description** |
| --- | --- | --- |
| **ICD-9-CM** | | |
| 491.0 | COPD | Simple chronic bronchitis |
| 491.1 | COPD | Mucopurulent chronic bronchitis |
| 491.20 | COPD | Obstructive chronic bronchitis without exacerbation |
| 491.21 | COPD | Obstructive chronic bronchitis with (acute) exacerbation |
| 491.22 | COPD | Obstructive chronic bronchitis with acute bronchitis |
| 491.8 | COPD | Other chronic bronchitis |
| 491.9 | COPD | Unspecified chronic bronchitis |
| 492.0 | COPD | Emphysematous bleb |
| 492.8 | COPD | Other emphysema |
| 496 | COPD | Chronic airway obstruction, not elsewhere classified |
| 493.02 | AECOPD if primary diagnosis with COPD secondary diagnosis | Extrinsic asthma with (acute) exacerbation |
| 493.12 | AECOPD if primary diagnosis with COPD secondary diagnosis | Intrinsic asthma with (acute) exacerbation |
| 493.22 | AECOPD if primary diagnosis with COPD secondary diagnosis | Chronic obstructive asthma with (acute) exacerbation |
| 493.92 | AECOPD if primary diagnosis with COPD secondary diagnosis | Asthma, unspecified type, with (acute) exacerbation |
| 466.x | AECOPD if primary diagnosis with COPD secondary diagnosis | Acute bronchitis and bronchiolitis |
| 494.1 | AECOPD if primary diagnosis with COPD secondary diagnosis | Bronchiectasis with acute exacerbation |
| 480.x-488.x | AECOPD if primary diagnosis with COPD secondary diagnosis | Pneumonia and influenza |
| 490 | AECOPD if primary diagnosis with COPD secondary diagnosis | Bronchitis, not specified as acute or chronic |
| 518.8x | AECOPD if primary diagnosis with COPD secondary diagnosis | Other diseases of the lung (including respiratory failure) |
| **ICD-10-CM** | | |
| J41.0 | COPD | Simple chronic bronchitis |
| J41.1 | COPD | Mucopurulent chronic bronchitis |
| J41.8 | COPD | Mixed simple and mucopurulent chronic bronchitis |
| J42 | COPD | Unspecified chronic bronchitis |
| J43.0 | COPD | Unilateral pulmonary emphysema [MacLeod's syndrome] |
| J43.1 | COPD | Panlobular emphysema |
| J43.2 | COPD | Centrilobular emphysema |
| J43.8 | COPD | Other emphysema |
| J43.9 | COPD | Emphysema, unspecified |
| J44.0 | COPD | Chronic obstructive pulmonary disease with acute lower respiratory infection |
| J44.1 | COPD | Chronic obstructive pulmonary disease with (acute) exacerbation |
| J44.9 | COPD | Chronic obstructive pulmonary disease, unspecified |
| J45.51 | AECOPD if primary diagnosis with COPD secondary diagnosis | Severe persistent asthma with (acute) exacerbation |
| J45.902 | AECOPD if primary diagnosis with COPD secondary diagnosis | Other and unspecified asthma with (acute) exacerbation |
| J09.%-J18.% | AECOPD if primary diagnosis with COPD secondary diagnosis | Influenza and pneumonia |
| J45.41 | AECOPD if primary diagnosis with COPD secondary diagnosis | Moderate persistent asthma with (acute) exacerbation |
| J45.31 | AECOPD if primary diagnosis with COPD secondary diagnosis | Mild persistent asthma with (acute) exacerbation |
| J45.21 | AECOPD if primary diagnosis with COPD secondary diagnosis | Mild intermittent asthma with (acute) exacerbation |
| J47.1 | AECOPD if primary diagnosis with COPD secondary diagnosis | Bronchiectasis with (acute) exacerbation |
| J20.% | AECOPD if primary diagnosis with COPD secondary diagnosis | Acute bronchitis |
| J21.% | AECOPD if primary diagnosis with COPD secondary diagnosis | Acute bronchiolitis |
| J22 | AECOPD if primary diagnosis with COPD secondary diagnosis | Unspecified acute lower respiratory infection |
| J96.0% and J96.2% | AECOPD if primary diagnosis with COPD secondary diagnosis | Acute respiratory failure |

**Abbreviations:** AECOPD, acute exacerbation of chronic obstructive pulmonary disease; COPD, chronic obstructive pulmonary disease; ICD-9-CM, International Classification of Diseases, Ninth Revision, Clinical Modification; ICD-10-CM, International Classification of Diseases, Tenth Revision, Clinical Modification

**Supplemental Table 2:** **Diagnosis codes used to identify serious acute CV events**

| **Condition** | **ICD-9-CM codes** | **ICD-10-CM codes** | **Definition** |
| --- | --- | --- | --- |
| Acute myocardial infarction | 410.X | I21.% | Acute myocardial infarction |
|  | I22.% | Subsequent myocardial infarction |
| Unstable angina | 411.1 |  | Intermediate coronary syndrome |
|  | I20.0 | Atherosclerosis of autologous artery coronary artery bypass graft(s) with unstable angina pectoris |
| 414.01 | I25.110 | Atherosclerotic heart disease of the native coronary artery with unstable angina pectoris |
| 414.05 | I25.700 | Atherosclerosis of coronary artery bypass graft(s), unspecified, with unstable angina pectoris |
| 414.02 | I25.710 | Atherosclerosis of autologous vein coronary artery bypass graft(s) with unstable angina pectoris |
|  | I25.720 | Atherosclerosis of autologous artery coronary artery bypass graft(s) with unstable angina pectoris |
| 414.03 | I25.730 | Atherosclerosis of nonautologous biological coronary artery bypass graft(s) with unstable angina pectoris |
| 414.06 | I25.750 | Atherosclerosis of native coronary artery of transplanted heart with unstable angina |
| 414.07 | I25.760 | Atherosclerosis of bypass graft of coronary artery of transplanted heart with unstable angina |
| 414.04 | I25.790 | Atherosclerosis of other coronary artery bypass graft(s) with unstable angina pectoris |
| Ischemic stroke | 433.01 |  | Occlusion and stenosis of basilar artery with cerebral infarction |
| 433.11 |  | Occlusion and stenosis of carotid artery with cerebral infarction |
| 433.21 |  | Occlusion and stenosis of vertebral artery with cerebral infarction |
| 433.31 |  | Occlusion and stenosis of multiple and bilateral precerebral arteries with cerebral infarction |
| 433.81 |  | Occlusion and stenosis of other specified precerebral artery with cerebral infarction |
| 433.91 |  | Occlusion and stenosis of unspecified precerebral artery with cerebral infarction |
| 434.01 |  | Cerebral thrombosis with cerebral infarction |
| 434.11 |  | Cerebral embolism with cerebral infarction |
| 434.91 |  | Cerebral artery occlusion, unspecified with cerebral infarction |
| 346.6X |  | Persistent migraine aura with cerebral infarction |
|  | I63.% | Cerebral infarction |
|  | G43.6% | Persistent migraine aura with cerebral infarction |
| Acute heart failure | 428.X | I50.% | Heart failure |
| 402.x1 | I11.0% | Hypertensive heart disease with heart failure |
|  | I13.0% | Hypertensive heart and chronic kidney disease with heart failure and stage 1 through stage 4 chronic kidney disease, or unspecified chronic kidney disease |
| 404.x1, 404.x3 | I13.2% | Hypertensive heart and chronic kidney disease with heart failure and with stage 5 chronic kidney disease, or end stage renal disease |
| Pulmonary embolism and deep vein thrombosis | 415.1x |  | Acute pulmonary heart disease |
|  | I26.% | Pulmonary embolism |
|  | I80.10 | Phlebitis and thrombophlebitis of femoral vein |
|  | I80.209 | Phlebitis and thrombophlebitis of unspecified deep vessels of unspecified lower extremity |
| 451.83 |  | Phlebitis and thrombophlebitis of unspecified deep veins of upper extremities |
| 451.84 |  | Phlebitis and thrombophlebitis of unspecified deep veins of upper extremities, unspecified |
| 451.89 |  | Phlebitis and thrombophlebitis of other site |
| 451.9 |  | Phlebitis and thrombophlebitis of unspecified site |
| 451.81 | I80.219 | Phlebitis and thrombophlebitis of unspecified iliac vein |
| 451.1x, 451.2x | I80.3 | Phlebitis and thrombophlebitis of lower extremities, unspecified |
|  | I80.9 | Phlebitis and thrombophlebitis of unspecified site |
|  | I80.8 | Phlebitis and thrombophlebitis of other sites |
| 453.82 | I82.4% | Acute embolism and thrombosis of deep veins of lower extremity |
| 453.84 | I82.A1% | Acute embolism and thrombosis of axillary vein |
|  | I82.62% | Acute embolism and thrombosis of deep veins of upper extremity |
| 453.86 | I82.C1% | Acute embolism and thrombosis of internal jugular vein |
| 453.85 | I82.B1% | Acute embolism and thrombosis of subclavian vein |
| 453.87 | I82.290 | Acute embolism and thrombosis of other thoracic veins |
|  | I82.210 | Acute embolism and thrombosis of superior vena cava |
| 453.83 | I82.60% | Acute embolism and thrombosis of unspecified veins of upper extremity |
| 453.89 | I82.890 | Acute embolism and thrombosis of other specified veins |
| 453.9 | I82.90 | Acute embolism and thrombosis of unspecified vein |
|  |  | Acute venous embolism and thrombosis of deep vessels of lower extremity |
| Serious cardiac arrhythmia | 427.x (except 427.3 and 427.5) | I49.% | Other cardiac arrhythmias |
|  | I47.% | Paroxysmal tachycardia |
| 427.3x | I48.0 | Paroxysmal atrial fibrillation |
|  | I48.1 | Persistent atrial fibrillation |
|  | I48.3 | Typical atrial flutter |
|  | I48.4 | Atypical atrial flutter |
|  | I48.9% | Unspecified atrial fibrillation and atrial flutter |
| Cardiac arrest | 427.5 | I46.% | Cardiac arrest |

**Abbreviations:** AECOPD, acute exacerbation of chronic obstructive pulmonary disease; COPD, chronic obstructive pulmonary disease; CV, cardiovascular; ICD-9-CM, International Classification of Diseases, Ninth Revision, Clinical Modification; ICD-10-CM, International Classification of Diseases, Tenth Revision, Clinical Modification

**Supplemental Table 3:** **Variables included in Cox proportional hazards models to adjust for confounding**

| **Variable** | **Operational definition** |
| --- | --- |
|  | *Demographic variables* |
| Sex | Male/Female |
| Urbanicity of home neighborhood | Categories: Urban, semi-urban, rural This is based on county designations by the National Center for Health Statistics measured during the baseline period as close to the index date as possible. |
| Region of residence | Categories: Northeast, South, Midwest, West  Measured during the baseline period. |
| Age at index | Continuous (years), measured the day before the index date. Should be ≥40 |
| Insurance payor | Categories: Commercial, medicare advantage, other |
| Calendar year of index date | Continuous, Range: 2012-2019. |
| Socioeconomic status | Neighborhood (block group) socioeconomic status calculated as laid out in the Agency for Healthcare Research and Quality report. Defined for 2017 using data from the American Community Survey.24 Categorized into quartiles. |
| Duration of COPD prior to index date | Continuous; Time period from incident COPD diagnosis date to the day before the index date. |
|  | Comorbid conditions |
| Serious lower respiratory infections | Number (%) of subjects with a primary inpatient diagnosis of a lower respiratory infection including pneumonia, influenza, tuberculosis or acute bronchitis without a diagnosis of COPD.  Number of serious lower respiratory infections in the 1-year prior to index will also be measured. |
| Congestive heart failure | Binary indicator of whether the patient had this diagnosis during the baseline period. |
| Hyperlipidemia |
| Hypertension |
| Charlson Comorbidity Index | The Charlson Comorbidity index will be created based on the following two publications Quan et al. 2011 and Quan et al. 2005.35,36  If patients have multiple measures of this information, use the closest measure preceding the index date. Components of this index will be summarized separately. |
| Chronic kidney disease | Binary indicator of whether the patient had this diagnosis during the baseline period. |
| Pneumothorax | Binary indicator of whether the patient had this event during the baseline period |
| Pulmonary edema | Binary indicator of whether the patient had this diagnosis during the baseline period |
| Sleep apnea | Binary indicator of whether the patient had this diagnosis during the baseline period |
| Any cancer | Binary indicator of whether the patient had any cancer diagnosis (except basal cell carcinoma) during the baseline period |
| Alpha-1 antitrypsin deficiency | Binary indicator of whether the patient had this diagnosis during the baseline period. |
| Bronchiectasis |
| Extrinsic allergic alveolitis |
| Interstitial lung disease |
| Pleural disease |
| Sarcoidosis |
| Acute CV events | Binary indicator of whether the patient had any acute CV event at any time between January 1, 2006, and 6 months prior to the index date. |
| CV procedures | Binary indicator of whether the patient had any procedures related to acute CV events (possibly to prevent such events). |
|  | *Prescription Medications* |
| Antihistamines | Binary indicators for patients with a dispensing of these medications during the baseline period. |
| Lipid-lowering agents | Binary indicator identifying any dispensing of these medications during the baseline period.  Number of fills and cost of these medications during follow-up for secondary analysis. |
| Antihypertensive agents | Binary indicator identifying any dispensing of these medications during the baseline period.  Number of fills and cost of these medications during follow-up for secondary analysis. |
| Antiarrhythmics | Binary indicator identifying any dispensing of these medications during the baseline period.  Number of fills and cost of these medications during follow-up for secondary analysis. |
| Antianginal agents | Binary indicator identifying any dispensing of these medications during the baseline period.  Number of fills and cost of these medications during follow-up for secondary analysis. |
| Other CV agents | Binary indicator identifying any dispensing of these medications during the baseline period.  Number of fills and cost of these medications during follow-up for secondary analysis. Includes Letairis, Ambrisentan, Caduet, Tracleer, Bosentan, Nylidrin HCL, Papaverine HCL, etc. |
| Anticoagulants | Binary indicator identifying any dispensing of these medications during the baseline period.  Number of fills and cost of these medications during follow-up for secondary analysis. |
| Immunosuppressants | Binary indicator identifying any dispensing of these medications during the baseline period. |
| Antidiabetic agents | Binary indicator identifying any dispensing of these medications during the baseline period. |
| Antifungal agents | Binary indicator identifying any dispensing of these medications during the baseline period. |
| Antiviral agents | Binary indicator identifying any dispensing of these medications during the baseline period. |
| Inhaled corticosteroids | Binary indicator and number of dispensings for patients with a dispensing of inhaled budesonide, flunisolide, fluticasone propionate, beclomethasone dipropionate, ciclesonide, mometasone during the baseline period.  Number of dispensings and cost of these medications during follow-up. |
| Oral corticosteroids | Binary indicator and number of dispensings for patients with a dispensing of prednisone (Prednisone Intensol, Rayos), hydrocortisone (Cortef), prednisolone (Prelone), methylprednisolone (Medrol), or dexamethasone (Dexamethasone Intensol) during the baseline period.  Number of dispensings and cost of these medications during follow-up. |
| Long-acting bronchodilators | Binary indicator and number of dispensings for patients with a dispensing of long-acting muscarinic antagonists, long-acting beta2-agonists, or their combinations with inhaled or oral corticosteroids during the baseline period.  Number of dispensings and cost of these medications during follow-up. |
| Short-acting bronchodilators | Short-acting beta agonists, short-acting muscarinic antagonists, or their combinations with corticosteroids. An indicator that a patient had a dispensing and the number of dispensings will be measured.  Number of dispensings and cost of these medications during follow-up. |
| Glucocorticoids | Binary indicators and number of dispensings of oral, IV glucocorticoids during the baseline period and a separate indicator measuring this during follow-up to define a moderate AECOPD.  Number of dispensings and cost of these medications during follow-up. |
| Antibiotics | Binary indicator and number of dispensings of inhaled, oral, nebulization or IV antibiotics during the baseline period and a separate indicator measuring this during follow-up to define a moderate AECOPD.  Number of dispensings and cost of these medications during follow-up. |
|  | Health care resource utilization |
| Hospitalizations | Count of distinct hospitalizations within 1 year prior to the index date; Continuous |
| Outpatient visits | Count of distinct outpatient visits within 1 year prior to the index date; Continuous |
| Pulmonologist visits | Number (%) of subjects with visits to a pulmonologist within 1 year prior to the index date |
| Cardiologist visits | Number (%) of subjects with visits to a cardiologist within 1 year prior to the index date |

**Abbreviations:** AECOPD, acute exacerbation of chronic obstructive pulmonary disease; COPD, chronic obstructive pulmonary disease; CV, cardiovascular; HCL, hydrochloride; IV, intravenous

**Supplemental Table 4. Selection of the incident COPD study population**

| **Step** | **Criteria** | **Counts** | | **% of prior step** | |
| --- | --- | --- | --- | --- | --- |
| 1 | Diagnosis of COPDa between January 1, 2012 and December 31, 2019 | 1,175,622 | | 100% | |
| 2 | Age ≥ 40 on the date of first COPD diagnosis | 1,095,771 | | 93% | |
| 3 | No COPD diagnosis prior to the first diagnosis during the screening period | 814,674 | | 74% | |
| 4 | Continuous health plan enrollment during the 12-months prior to the first COPD diagnosis during the screening period | 435,925 | | 54% | |
|  |  | **Counts** | **% of prior step** | **Counts** | **% of prior step** |
|  | **Cohort 1: 1-AECOPD and 0-AECOPD Comparator** | **AECOPD cohortb** | | **Comparator cohortc** | |
| 5a | Had a first AECOPD or assigned comparator index date | 170,236 | 39% | 435,925 | 100% |
| 6a | Continuous health plan enrollment from the first COPD diagnosis date through the index date | 168,180 | 99% | 411,959 | 95% |
| 7a | No acute CV event in the 6 months prior to the index date | 158,778 | 94% | 384,633 | 93% |
| 8a | No history of AECOPD prior to the index date | NA | NA | 270,796 | 70% |
| 9a | Patients with complete datad | **145,838** | 92% | **249,703** | 92% |
|  | **Cohort 2: 2-AECOPD and 1-AECOPD Comparator** |  |  |  |  |
| 5b | Had a cohort specific index date | 68,618 | 43% | 170,236 | 63% |
| 6b | Continuous health plan enrollment from the first COPD diagnosis date through the index date | 66,548 | 97% | 150,983 | 89% |
| 7b | No history of acute CV events in the 6 months prior to the index date | 59,882 | 90% | 141,255 | 94% |
| 8b | No history of 2nd AECOPD prior to the 1-AECOPD comparator index date | NA | NA | 79,119 | 56% |
| 9b | Patients with complete datad | **55,503** | 93% | **72,840** | 92% |
|  | **Cohort 3: 3-AECOPD and 2-AECOPD Comparator** |  |  |  |  |
| 5c | Had a cohort specific index date | 39,672 | 66% | 68,618 | 87% |
| 6c | Continuous health plan enrollment from the first COPD diagnosis date through the index date | 38,090 | 96% | 62,465 | 91% |
| 7c | No history of acute CV events in the 6 months prior to the index date | 33,308 | 87% | 57,014 | 91% |
| 8c | No history of 3rd AECOPD prior to the comparator index date | NA | NA | 14,700 | 26% |
| 9c | Patients with complete datad | **31,012** | 93% | **13,620** | 93% |
| **Abbreviations:** AECOPD, acute exacerbation of chronic obstructive pulmonary disease; COPD, chronic obstructive pulmonary disease; CV, cardiovascular; ED emergency department; NA, not applicable | | | |  |  |
| a A diagnosis of COPD requires a primary diagnosis at an inpatient, outpatient or ED visit. | | | | | |
| b Index date for the AECOPD cohort is the date of the first moderate or severe acute exacerbation of COPD (AECOPD 1) and is similarly for AECOPD 2 and AECOPD 3 (*i.e.,* the 2nd and 3rd dates of a moderate or severe acute exacerbation). Some patients may appear in both the AECOPD and comparator cohorts if they started in the comparator cohort and later had an AECOPD. | | | | | |
| c Index date is an assigned date based on the distribution of time between the COPD diagnosis date and subsequent AECOPD dates. | | | | | |
| d Variables with missing data included geographic region, urbanicity, socioeconomic status and plan type | | | | | |
| There was 11% patient overlap in cohort 1, 12% overlap in cohort 2, and 11% overlap in cohort 3. | | | | | |

**Supplemental Table 5. Additional baseline comorbidities and medication use by AECOPD cohort**

|  | **1-AECOPD** | **0-AECOPD Comparator** | **Standardized mean differences** |
| --- | --- | --- | --- |
| **N=145,838** | **N=249,703** |
| **Index date year, N (%)** |  |  |  |
| 2012 | 12,374 (8.5) | 20,506 (8.2) | 0.01 |
| 2013 | 13,376 (9.2) | 22,250 (8.9) | 0.01 |
| 2014 | 17,631 (12.1) | 30,908 (12.4) | 0.01 |
| 2015 | 20,879 (14.3) | 34,734 (13.9) | 0.01 |
| 2016 | 21,685 (14.9) | 34,996 (14.0) | 0.02 |
| 2017 | 21,314 (14.6) | 33,875 (13.6) | 0.03 |
| 2018 | 19,927 (13.7) | 33,269 (13.3) | 0.01 |
| 2019 | 18,652 (12.8) | 39,165 (15.7) | 0.08 |
| **Comorbidities, N (%)** |  |  |  |
| Gastroesophageal reflux disease | 52,503 (36.0) | 91,333 (36.6) | 0.01 |
| Congestive heart failure | 17,096 (11.7) | 30,170 (12.1) | 0.01 |
| Pneumothorax | 2,304 (1.6) | 4,316 (1.7) | 0.01 |
| Alpha-1 antitrypsin deficiency | 173 (0.1) | 269 (0.1) | 0 |
| Extrinsic allergic alveolitis | 11,790 (8.1) | 19,840 (7.9) | 0.01 |
| Sarcoidosis | 1,016 (0.7) | 1,868 (0.7) | 0.01 |
| Pulmonary edema | 4,857 (3.3) | 7,837 (3.1) | 0.01 |
| CV procedures | 6,756 (4.6) | 13,055 (5.2) | 0.03 |
| Osteoporosis | 19,391 (13.3) | 36,016 (14.4) | 0.03 |
| Chronic kidney disease | 14,997 (10.3) | 28,057 (11.2) | 0.03 |
| Atrial fibrillation | 14,249 (9.8) | 27,278 (10.9) | 0.04 |
| Sleep apnea | 21,800 (14.9) | 40,088 (16.1) | 0.03 |
| Heart failure | 16,374 (11.2) | 28,901 (11.6) | 0.01 |
| **Prescription medications, N (%)** |  |  |  |
| Antiviral agents | 26,339 (18.1) | 38,852 (15.6) | 0.07 |
| Antidiabetic agents | 26,417 (18.1) | 44,554 (17.8) | 0.01 |
| Antifungal agents | 3,550 (2.4) | 5,551 (2.2) | 0.01 |
| Antihistamines | 25,291 (17.3) | 36,249 (14.5) | 0.08 |
| Lipid-lowering agents | 70,482 (48.3) | 121,888 (48.8) | 0.01 |
| Antihypertensive agents | 92,607 (63.5) | 156,419 (62.6) | 0.02 |
| **Mean (SD) dispensings in 1-year prior to index** |  |  |  |
| Glucocorticoids | 4.5 (8.5) | 3.4 (6.9) | 0.14 |
| Immunosuppressants | 1.6 (2.8) | 0.8 (2.3) | 0.29 |
| Long-acting bronchodilators | 2.1 (7.4) | 1.3 (5.9) | 0.12 |
| Short-acting bronchodilators | 2.8 (7.1) | 1.7 (5.4) | 0.16 |
| Inhaled corticosteroids | 2.0 (7.2) | 1.4 (6.0) | 0.1 |
| Oral corticosteroids | 2.5 (5.7) | 1.8 (4.6) | 0.14 |

**Abbreviations:** AECOPD, acute exacerbation of chronic obstructive pulmonary disease; CV, cardiovascular; N, number; SD, standard deviation

**Supplemental Table 6. Patient characteristics during follow-up by cohort**

| **Follow-up Characteristics** | **1-AECOPD** | **0-AECOPD Comparator** |
| --- | --- | --- |
| **N=145,838** | **N=249,703** |
| **Duration of follow-up (months)** |  |  |
| Mean (SD) | 17 (19) | 21 (20) |
| Median (IQR) | 10 (2-24) | 15 (6-32) |
| Min (Max) | 0.0 (96.0) | 0.0 (95.9) |
| **Additional COPD diagnoses over follow-up, N (%)** |  |  |
| 0 | 311 (0.2) | 99,563 (39.9) |
| 1 | 51,675 (35.4) | 60,240 (24.1) |
| 2 | 40,755 (27.9) | 30,593 (12.3) |
| 3+ | 53,097 (36.4) | 59,307 (23.8) |
| **Reasons for censoring, N (%)** |  |  |
| Death | 2,732 (1.9) | 6,026 (2.4) |
| End of study period | 97 (0.1) | 0 (0.0) |
| Disenrollment from health insurance | 82,107 (56.3) | 190,898 (76.5) |
| Subsequent AECOPD | 55,486 (38.0) | 40,292 (16.1) |
| Acute CV events | 5,416 (3.7) | 12,487 (5.0) |
| MI | 1,135 (0.8) | 2,535 (1.0) |
| Ischemic stroke | 696 (0.5) | 1,837 (0.7) |
| Unstable angina | 556 (0.4) | 1,364 (0.5) |
| Acute heart failure | 1,594 (1.1) | 3,366 (1.3) |
| Pulmonary embolism | 489 (0.3) | 1,019 (0.4) |
| Cardiac arrhythmia | 906 (0.6) | 2,285 (0.9) |
| Atrial fibrillation and flutter | 702 (0.5) | 1,632 (0.7) |
| Other serious arrhythmias | 204 (0.1) | 653 (0.3) |
| Cardiac arrest | 40 (0.03) | 81 (0.03) |

**Abbreviations:** AECOPD, acute exacerbation of chronic obstructive pulmonary disease; COPD, chronic obstructive pulmonary disease; CV, cardiovascular; IQR, interquartile range; MI, myocardial infarction; N, number; SD, standard deviation

**Supplemental Table 7.** **Hazard ratios of acute CV events by patient characteristic subgroup including and excluding CV events occurring on the COPD diagnosis date**

|  | **Including acute CV events occurring on the COPD diagnosis date** | | | | | **Excluding acute CV events occurring on the COPD diagnosis date** | | | | |
| --- | --- | --- | --- | --- | --- | --- | --- | --- | --- | --- |
|  | **1 AECOPD** | | **0- AECOPD Comparator** | | **Adjusteda HR  (95% CI)** | **1 AECOPD** | | **0- AECOPD Comparator** | | **Adjusteda HR  (95% CI)** |
| **Subgroup analyses** | **Cases** | **Person-years** | **Cases** | **Person-years** | **Cases** | **Person-years** | **Cases** | **Person-years** |
| Insurance payor |  |  |  |  |  |  |  |  |  |  |
| Commercial | 3,011 | 154,812.96 | 6,749 | 326,287.10 | 1.14 (1.09, 1.19) | 2,978 | 154,812.96 | 6,521 | 326,287.10 | 1.18 (1.13, 1.24) |
| Medicare advantage | 1,444 | 27,448.72 | 3,274 | 65,640.40 | 1.07 (1.00, 1.14) | 1,431 | 27,448.72 | 3,166 | 65,640.40 | 1.10 (1.03, 1.18) |
| Other | 1,024 | 20,971.96 | 2,507 | 54,793.22 | 1.07 (1.00, 1.16) | 1,021 | 20,971.96 | 2,457 | 54,793.22 | 1.10 (1.02, 1.18) |
| Urbanicity of home neighborhood | | | | | | | | | | |
| Urban | 2,857 | 107,177.83 | 6,693 | 241,941.34 | 1.10 (1.05, 1.15) | 2,841 | 107,177.83 | 6,494 | 241,941.34 | 1.13 (1.08, 1.18) |
| Semi-urban | 1,413 | 52,051.95 | 3,360 | 114,567.18 | 1.10 (1.03, 1.17) | 1,402 | 52,051.95 | 3,254 | 114,567.18 | 1.14 (1.07, 1.21) |
| Rural | 1,209 | 44,003.86 | 2,477 | 90,212.21 | 1.14 (1.06, 1.23) | 1,187 | 44,003.86 | 2,396 | 90,212.21 | 1.17 (1.09, 1.26) |
| Neighborhood socioeconomic status quartile | | | | | | | | | | |
| 1 (0-25%) | 1,018 | 35,360.77 | 2,093 | 71,434.13 | 1.12 (1.04, 1.21) | 1,010 | 35,360.77 | 2,025 | 71,434.13 | 1.16 (1.07, 1.26) |
| 2 (26-50%) | 1,510 | 53,820.93 | 3,241 | 113,585.68 | 1.14 (1.07, 1.22) | 1,492 | 53,820.93 | 3,135 | 113,585.68 | 1.18 (1.11, 1.26) |
| 3 (51-75%) | 1,559 | 57,237.90 | 3,562 | 128,507.09 | 1.14 (1.07, 1.21) | 1,544 | 57,237.90 | 3,451 | 128,507.09 | 1.17 (1.10, 1.25) |
| 4 (76-100%) | 1,392 | 56,814.04 | 3,634 | 133,193.83 | 1.03 (0.97, 1.10) | 1,384 | 56,814.04 | 3,533 | 133,193.83 | 1.06 (0.99, 1.13) |
| SABA dispensings in 1-year prior to index | | | | | | | | | | |
| None | 2,970 | 109,955.04 | 8,467 | 286,010.62 | 1.09 (1.04, 1.13) | 2,940 | 109,955.04 | 8,169 | 286,010.62 | 1.13 (1.08, 1.18) |
| 1 or more | 2,509 | 93,278.60 | 4,063 | 160,710.11 | 1.13 (1.07, 1.19) | 2,490 | 93,278.60 | 3,975 | 160,710.11 | 1.15 (1.09, 1.21) |
| History of respiratory infections in the 1-year prior to index | | | | | | | | | | |
| None | 4,566 | 190,999.80 | 10,736 | 418,888.58 | 1.09 (1.05, 1.13) | 4,518 | 190,999.80 | 10,376 | 418,888.58 | 1.13 (1.09, 1.17) |
| 1 or more | 913 | 12,233.84 | 1,794 | 27,832.14 | 1.21 (1.11, 1.31) | 912 | 12,233.84 | 1,768 | 27,832.14 | 1.23 (1.13, 1.34) |
| History of acute CV eventsb | | | | | | | | | | |
| Yes | 1,636 | 18,522.21 | 3,663 | 47,554.25 | 1.15 (1.08, 1.22) | 1,627 | 18,522.21 | 3,586 | 47,554.25 | 1.17 (1.10, 1.24) |
| No | 3,843 | 184,711.42 | 8,867 | 399,166.48 | 1.10 (1.06, 1.14) | 3,803 | 184,711.42 | 8,558 | 399,166.48 | 1.14 (1.10, 1.19) |

**Abbreviations:** AECOPD, acute exacerbation of chronic obstructive pulmonary disease; CI, confidence interval; COPD, chronic obstructive pulmonary disease; CV, cardiovascular; HR, Hazard ratio; SABA, short-acting beta 2-agonists

aCox proportional hazards models were adjusted for the following baseline demographics, comorbidities and medications: age, sex, urbanicity, region, insurance coverage, Index calendar year, socioeconomic status, COPD duration, serious lower respiratory infections, congestive heart failure, hyperlipidemia, hypertension, Charlson Comorbidity Index, chronic kidney disease, pneumothorax, pulmonary edema, sleep apnea, cancer, alpha-1 antitrypsin deficiency, bronchiectasis, extrinsic allergic alveolitis, interstitial lung disease, pleural disease, sarcoidosis, acute CV events, CV procedures, antihistamines, lipid-lowering agents, antihypertensive agents, antiarrhythmics, antianginal agents, other CV agents (including letairis, ambrisentan, caduet, tracleer, etc.), anticoagulants, immunosuppressants, antidiabetics, antifungals, antivirals, inhaled corticosteroids, oral corticosteroids, long-acting bronchodilators, SABA, glucocorticoids, antibiotics, hospitalizations, outpatient visits, pulmonologist visits, and cardiologist visits.

bAcute CV events are measured from the start of the study period until six months prior to the index date
